# Supplementary material for: Bruton's tyrosine kinase (Btk) inhibitor ibrutinib suppresses stem-like traits in ovarian cancer
Source: PubMed Central journal article supplement (PMC4537012; doi:10.18632/oncotarget.3658), 2015-03-26
Supplement: oncotarget-06-13255-s001.pdf [file oncotarget-06-13255-s001.pdf]

## Bruton's tyrosine kinase (Btk) inhibitor ibrutinib suppresses stem-like traits in ovarian cancer

### Supplementary Material

**Supplemental table 1:** List of antibody and application

| Antibody        | Catalogue number | Company        | Diluton                       | Application |
|-----------------|------------------|----------------|-------------------------------|-------------|
| Btk             | sc-28387         | Santa Cruz     | 1:700 (WB)<br>1:400 (IF, IHC) | WB, IF, IHC |
| Syk             | #2710            | Cell Signaling | 1:1000                        | WB          |
| p-PLC- $\delta$ | #2821P           | Cell Signaling | 1:1000                        | WB          |
| p-Jak-2         | #4406P           | Cell Signaling | 1:1000                        | WB          |
| Klf-4           | #4038            | Cell Signaling | 1:1000                        | WB          |
| c-Met           | #8198            | Cell Signaling | 1:1000                        | WB          |
| TCF-8           | #3396            | Cell Signaling | 1:1000                        | WB          |
| p-STAT-3        | #9145P           | Cell Signaling | 1:1000 (WB)<br>1:400 (IF)     | WB, IF      |
| Sox-2           | #3579            | Cell Signaling | 1:1000 (WB)<br>1:400 (IF)     | WB, IF      |
| Bcl-XL          | E021061          | Enogene        | 1:1000                        | WB          |
| N-Cadherin      | #4061            | Genetex        | 1:1000                        | WB          |
| $\alpha$ -actin | 8226             | Abcam          | 1:5000                        | WB          |

WB: Western blotting; IF : immunofluorescent staining; IHC: immunohistochemical staining
